# Supplementary material
Source: publisher figshare collection journal article supplement (https://sage.figshare.com/ndownloader/files/23659062)

## Appendix

**Appendix A.1:** List of members in the *Main Data Set* population and number of press releases per member:

| Member                   | Press Release Count |
|--------------------------|---------------------|
| Adam Schiff              | 943                 |
| Adam Smith               | 980                 |
| Al Green                 | 556                 |
| Albio Sires              | 719                 |
| Alcee Hastings           | 1,206               |
| Anna Eshoo               | 981                 |
| Barbara Lee              | 2,124               |
| Bennie Thompson          | 96                  |
| Betty McCollum           | 847                 |
| Bill Pascrell Jr         | 1,585               |
| Bobby Rush               | 865                 |
| Brad Sherman             | 713                 |
| Carolyn Maloney          | 2,618               |
| Cathy McMorris Rodgers   | 1,208               |
| Charles Grassley         | 8,307               |
| Charles Schumer          | 4,031               |
| Christopher Smith        | 2,587               |
| Collin Peterson          | 427                 |
| Dan Lipinski             | 1,260               |
| Danny Davis              | 179                 |
| David Price              | 994                 |
| David Scott              | 417                 |
| Debbie Stabenow          | 1,131               |
| Debbie Wasserman Schultz | 688                 |
| Devin Nunes              | 112                 |
| Diana DeGette            | 933                 |
| Dianne Feinstein         | 3,498               |
| Don Young                | 1,751               |
| Doris Matsui             | 1,682               |
| Dutch Ruppersberger      | 963                 |
| Earl Blumenauer          | 1,116               |
| Eddie Bernice Johnson    | 896                 |
| Eleanor Norton           | 3,931               |
| Elijah Cummings          | 1,142               |
| Eliot Engel              | 2,872               |
| Emanuel Cleaver II       | 357                 |
| Frank Lucas              | 314                 |
| Frank Pallone            | 2,402               |
| Fred Upton               | 886                 |

|                       |       |
|-----------------------|-------|
| GK Butterfield        | 623   |
| Grace Napolitano      | 539   |
| Greg Walden           | 893   |
| Gregory Meeks         | 798   |
| Gwen Moore            | 663   |
| Harold Rogers         | 956   |
| Henry Cuellar         | 1,474 |
| Jack Reed             | 3,185 |
| James Clyburn         | 366   |
| James Inhofe          | 3,572 |
| James Sensenbrenner   | 394   |
| Jan Schakowsky        | 1,844 |
| Jeff Fortenberry      | 371   |
| Jerrold Nadler        | 1,824 |
| Jim Cooper            | 675   |
| Jim Costa             | 993   |
| Jim Langevin          | 1,506 |
| Jim McGovern          | 877   |
| Joe Wilson            | 1,192 |
| John Carter           | 1,298 |
| John Cornyn           | 3,392 |
| John Larson           | 1,654 |
| John Lewis            | 718   |
| John Shimkus          | 528   |
| John Thune            | 2,112 |
| Johnny Isakson        | 2,021 |
| Jose Serrano          | 1,051 |
| Kay Granger           | 577   |
| Ken Calvert           | 684   |
| Kenny Marchant        | 673   |
| Kevin Brady           | 951   |
| Lamar Alexander       | 3,892 |
| Linda Sanchez         | 810   |
| Lindsey Graham        | 1,721 |
| Lisa Murkowski        | 3,097 |
| Lloyd Doggett         | 976   |
| Louie Gohmert         | 303   |
| Lucille Roybal-Allard | 1,710 |
| Marcy Kaptur          | 1,155 |
| Maria Cantwell        | 3,005 |
| Mario Diazbalart      | 851   |
| Maxine Waters         | 1,095 |
| Michael Burgess       | 1,062 |
| Michael Conaway       | 674   |

|                    |       |
|--------------------|-------|
| Michael Crapo      | 2,573 |
| Michael Enzi       | 2,171 |
| Michael McCaul     | 736   |
| Mike Doyle         | 395   |
| Mike Rogers        | 596   |
| Mike Simpson       | 770   |
| Mike Thompson      | 1,120 |
| Mike Turner        | 894   |
| Mitch McConnell    | 3,534 |
| Nancy Pelosi       | 4,668 |
| Nita Lowey         | 1,347 |
| Nydia Velazquez    | 719   |
| Pat Roberts        | 1,670 |
| Patrick Leahy      | 4,853 |
| Patrick McHenry    | 703   |
| Patty Murray       | 4,406 |
| Pete Visclosky     | 649   |
| Peter DeFazio      | 914   |
| Raul Grijalva      | 1,226 |
| Richard Burr       | 1,482 |
| Richard Durbin     | 3,949 |
| Richard Neal       | 438   |
| Richard Shelby     | 1,838 |
| Rick Larsen        | 1,581 |
| Rob Bishop         | 657   |
| Robert Aderholt    | 433   |
| Robert Scott       | 995   |
| Ron Kind           | 1,086 |
| Ron Wyden          | 2,201 |
| Rosa Delauro       | 2,823 |
| Sam Graves         | 437   |
| Sanford Bishop Jr  | 911   |
| Sheila Jackson Lee | 512   |
| Steny Hoyer        | 1,849 |
| Stephen Lynch      | 675   |
| Steve King         | 1,346 |
| Susan Collins      | 1,952 |
| Susan Davis        | 305   |
| Thomas Carper      | 3,624 |
| Tim Ryan           | 1,428 |
| Tom Cole           | 920   |
| Virginia Foxx      | 852   |
| William Lacy Clay  | 362   |
| William Thornberry | 456   |

|              |                |
|--------------|----------------|
| Zoe Lofgren  | 745            |
| <b>Total</b> | <b>184,873</b> |

**Appendix A.2:** List of members in the *Close Elections Data Set* population and number of press releases per member:

| <b>Member</b>  | <b>Press Release Count</b> |
|----------------|----------------------------|
| Alex Mooney    | 114                        |
| Ami Bera       | 190                        |
| Bob Dold Jr.   | 139                        |
| Brad Ashford   | 143                        |
| Bruce Poliquin | 626                        |
| Cory Gardner   | 939                        |
| Crescent Hardy | 121                        |
| Dan Sullivan   | 615                        |
| Frank Guinta   | 207                        |
| Gwen Graham    | 156                        |
| Jeanne Shaheen | 1,426                      |
| Jerry McNerney | 240                        |
| John Delaney   | 767                        |
| Julia Brownley | 311                        |
| Mark R. Warner | 1,251                      |
| Martha McSally | 517                        |
| Pete Aguilar   | 354                        |
| Rod Blum       | 140                        |
| Scott Peters   | 427                        |
| Sean Maloney   | 516                        |
| Thom Tillis    | 708                        |
| Will Hurd      | 316                        |
| <b>Total</b>   | <b>10,223</b>              |

**Appendix B.1:** Distribution of *Main Data Set* Press Releases by Year:

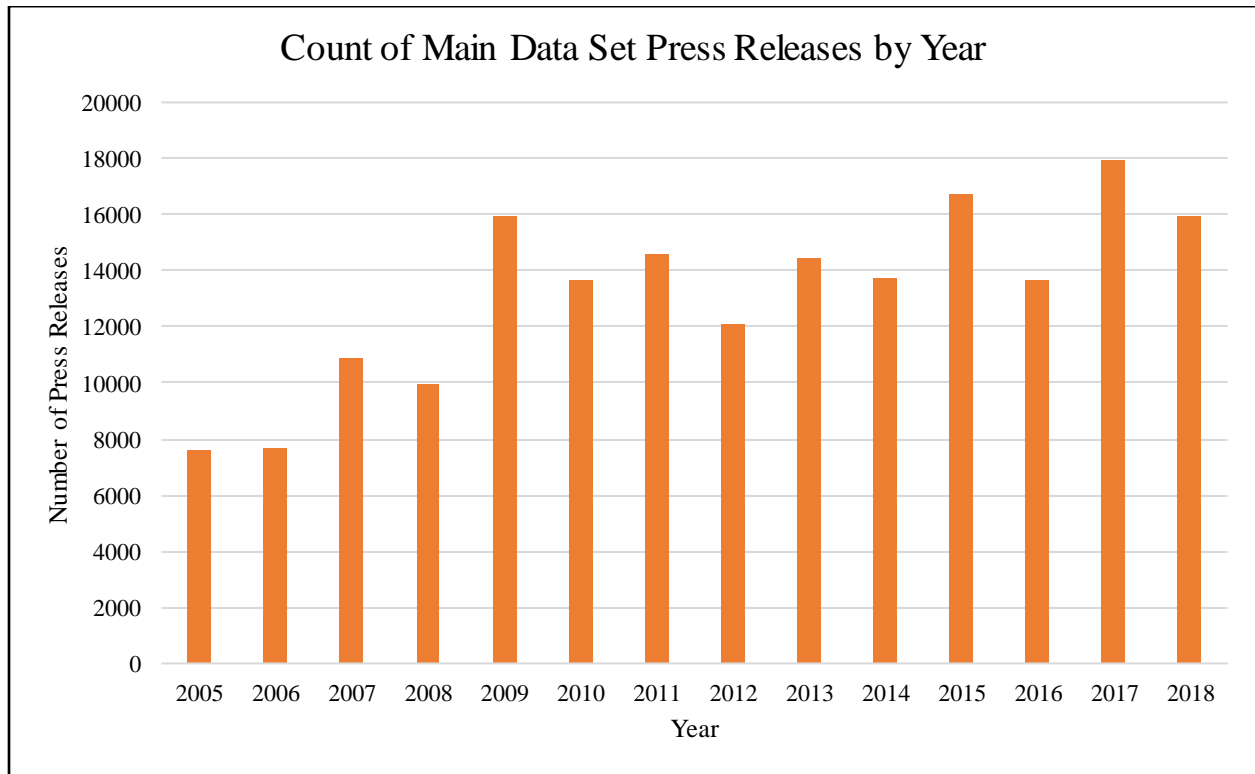

**Appendix B.2:** Distribution of *Close Elections Data Set* Press Releases by Year:

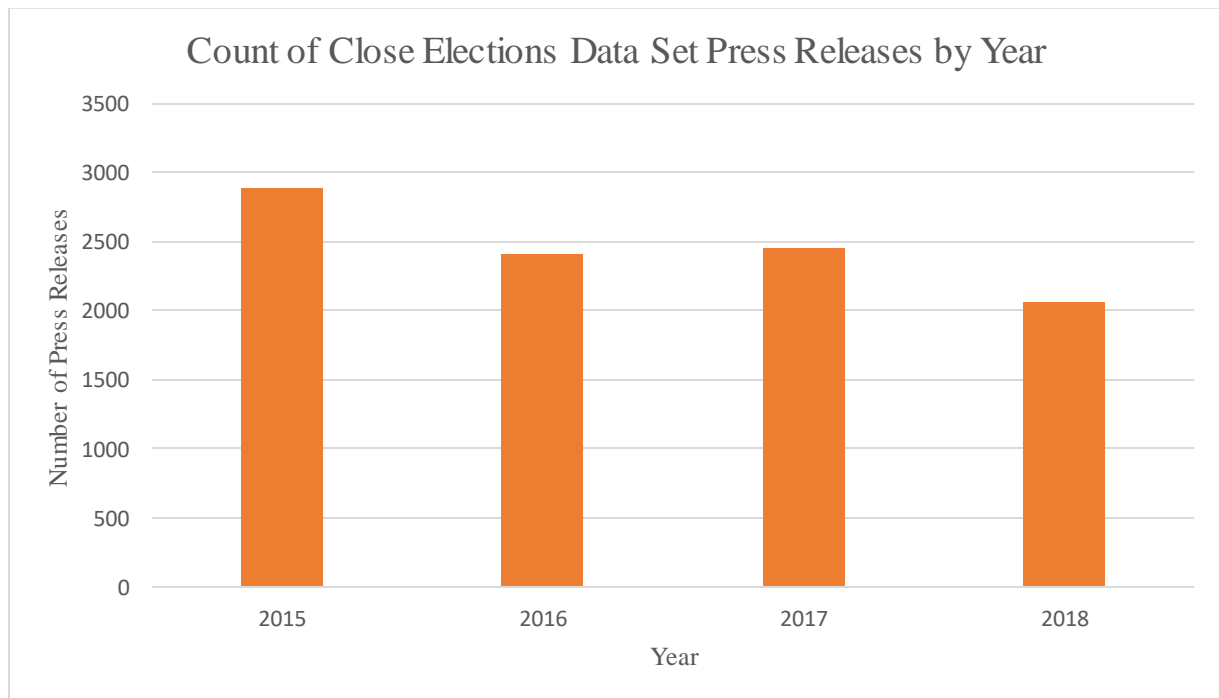

## **Appendix C:** Sample press releases, coded under the framework of Mayhew 1974:

Position-taking: (Washington, DC)--On October 1, 2013, Congressman Al Green released the following statement on the GOP government shutdown. \Tonight's government shut down represents a collective failure to responsibly govern our country. It is truly disappointing that we have, allowed a partisan minority to impede the progress and recovery of our country. \I am a true believer in the American democratic system; one that is predicated on a legislature, an executive branch and a judicial branch acting as a check and balance to each other. I believe that when the legislature passes a law, that is then signed by the executive and then upheld by the judicial branch, the final product is one that reflects the representative will of the American people in our representative form of government. \The Affordable Care Act was passed by Congress, signed by the President and upheld by the Supreme Court of the United States of America-it is the law of the land. I support amending it to improve it; but I do not support using a government shutdown to end it, as many of my colleagues have chosen to do. \I remain committed to finding a solution and I will continue to work with my Democratic and Republican colleagues until we find such a solution without closing the doors of healthcare to more than 6 million Texans. We must not turn our backs on the millions who will benefit from the Affordable Care Act to placate a partisan minority.\""

Advertising: (Washington, DC)--This Friday, Congressman Al Green will join with all Americans in commemorating the tragic events of September 11, 2001, with a National Day of Service and Remembrance. Created by the Edward M. Kennedy Serve America Act, the National Day of Service channels the powerful sense of unity, patriotism and shared purpose Americans felt in the wake of the 9/11 attacks into meaningful action in our communities. \As America reflects on the tragic events of 9/11, let us remember the thousands of men, women and children who lost their lives and the servicemen, first-responders and volunteers who answered the call to service. In a time of crisis, the American people stood in solidarity against fear and terrorism,\Congressman Al Green said. \It is in this spirit of selfless sacrifice and compassion that the House passed H.R. 722, recognizing September 11th as National Day of Service and Remembrance.\The National Day of Service and Remembrance is the culmination of several months of service projects-an important part of the Kennedy Act. Projects held in all fifty states and the District of Columbia included food drives, neighborhood cleanups and volunteer construction work. Hundreds of additional projects involving tens of thousands of volunteers, nonprofits, businesses, faith groups and governments will take place across the country as Americans reflect on the 9/11 anniversary. \September 11th serves as a powerful reminder our country's strength - that in the face of great adversity, America rises and overcomes it. The American people are resolved to protect the universal ideals that make our nation great: freedom, equality and democracy,\Congressman Al Green said. \We have a responsibility to do all in our power to ensure that our country is secure now and for future generations. I proudly continue to work with my House colleagues and President Obama to keep our nation secure and strong, and I encourage my constituents to join me this September 11th and in the days ahead in giving back to our community and honoring the memories of those who have already given us so much.\""

Credit-claiming: Today, U.S. Rep. Collin Peterson (D-Minn.) announced over \$35 million for Water and Wastewater Infrastructure improvements in rural Minnesota communities. The funding comes from the United States Department of Agriculture (USDA) Rural Development Water and Waste Disposal Loan and Grant Program. \Upgrading and investing in local water

systems creates jobs while keeping communities healthy,\" Peterson said. \"These funds are critical to meeting our rural communities' water treatment needs.\" The upgrades will improve the drinking water, storm water drainage, and waste water systems in Redwood, Mahnomen, Douglas, Cottonwood, Big Stone, and Lyon counties. Details for funding below: Tracy, MN will receive a loan of \$8,399,000 and a grant of \$4,458,000 Clinton, MN will receive a loan of \$4,595,000 and a grant of \$2,369,000 Red Rock Rural Water will receive a loan of \$1,400,000 Farwell-Kensington Sanitary District will receive a loan of \$325,000 and a grant of \$1,095,000 Mahnomen, MN will receive a loan of \$11,919,000 Revere, MN will receive a loan of \$161,000 and a grant of \$402,000 Congressman Peterson is a strong advocate for the Water and Waste Disposal Loan and Grant Program which serves small rural communities. In 2017 he led the effort to protect the program which was slated to be eliminated in President Trump's Budget Request."

**Appendix D:** Distribution of Sentiment Scores for *Main Data Set* and *Close Election Data Set* Press Releases, Respectively:

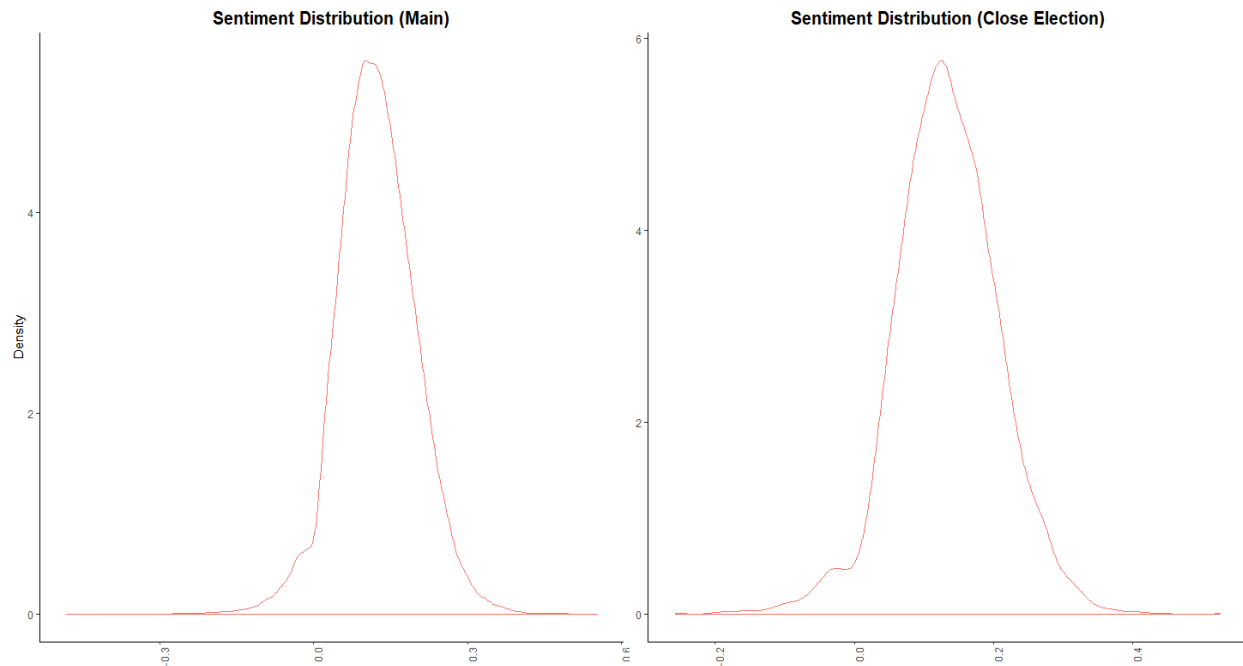

## Appendix E: Model Sentiment Score Validation

We randomly sampled two hundred press releases and review the direction of their sentiment scores. We considered the sentiment score to be correct if the score was greater than or equal to 0 for texts written with a positive tone and if the score was less than 0 for texts written with a negative tone. We find an overall accuracy rating of 78%.

We note, however, that our model tended to inflate sentiment scores across all texts. Consequently, texts that read negatively often received scores greater than zero. Below is a table illustrating the rate of false positives and false negatives:

|        |          | Model Score |          |
|--------|----------|-------------|----------|
|        |          | Positive    | Negative |
| Actual | Positive | 154         | 2        |
|        | Negative | 42          | 2        |

We see that the model is able to accurately characterize texts with positive sentiment but it was only able to correctly identify two of the forty-four negative texts. As discussed in the Limitations section, we do not believe this is a significant issue as our analysis involves comparing scores rather than labeling them in absolute (i.e. “positive” or “negative”) terms. We include box plots illustrating the minimum, quartile one, median, quartile two, and maximum sentiment scores for true positives (positive texts that were correctly identified by the model as positive) and for false positives (negative texts that were incorrectly identified by the model as positive), respectively. We see that the aforementioned measurements are all greater for true positives than for false positives. Consequently, we are confident that all (and not just the negative) press releases experienced a shift in their scores towards the positive side and that our comparative analysis is valid.

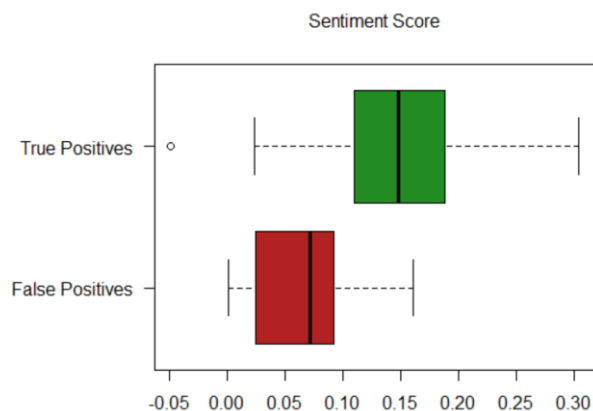



**Appendix F:** List of issue topics as well as count of press releases per each topic

| Topic                                | Main Data Set  |               | Close Elections Data Set |              |
|--------------------------------------|----------------|---------------|--------------------------|--------------|
|                                      | Dem Count      | Rep Count     | Dem Count                | Rep Count    |
| AG/Justice                           | 1,841          | 1,467         | 42                       | 79           |
| Agriculture                          | 1,348          | 1,371         | 54                       | 54           |
| Approp: Firefight                    | 1,816          | 1,033         | 52                       | 55           |
| Approp: General                      | 4,412          | 1,964         | 124                      | 199          |
| Approp: Healthcare                   | 3,769          | 1,732         | 99                       | 108          |
| Approp: HUD                          | 1,973          | 551           | 53                       | 36           |
| Approp: Transportation               | 4,307          | 1,265         | 184                      | 136          |
| Approp: Water Proj.                  | 1,930          | 798           | 50                       | 36           |
| Cancer/Research                      | 426            | 166           | 5                        | 8            |
| Childrens' Issues                    | 2,340          | 1,115         | 60                       | 58           |
| Civil/Human Rights                   | 2,553          | 1,311         | 55                       | 58           |
| Energy/Clean/Oil                     | 3,298          | 2,930         | 111                      | 91           |
| Environment                          | 1,685          | 1,511         | 107                      | 79           |
| FDA/Food Policy                      | 1,514          | 442           | 14                       | 10           |
| Federal Budget                       | 2,435          | 2,076         | 87                       | 82           |
| Financial System/Consumer Protection | 2,378          | 784           | 34                       | 120          |
| Gun Violence                         | 1,897          | 367           | 85                       | 53           |
| Healthcare                           | 4,813          | 2,969         | 143                      | 195          |
| High School Competition              | 2,365          | 1,443         | 88                       | 87           |
| Higher Education                     | 3,276          | 1,409         | 120                      | 109          |
| Honorary                             | 2,235          | 1,135         | 81                       | 88           |
| International Relations/Conflict     | 3,775          | 2,434         | 192                      | 231          |
| Iran/North Korea Nuclear Deal        | 982            | 885           | 121                      | 104          |
| Iraq War                             | 1,503          | 820           | 17                       | 10           |
| Jobs/Economy                         | 5,502          | 2,346         | 207                      | 248          |
| Judicial nom.                        | 2,493          | 2,078         | 71                       | 99           |
| Law Enforcement/Crime                | 2,188          | 1,397         | 99                       | 95           |
| Legislative Activity/Voting          | 6,649          | 5,804         | 257                      | 342          |
| Memorial/Womens' Issues              | 2,036          | 405           | 73                       | 76           |
| Military/Defense                     | 2,212          | 3,085         | 210                      | 261          |
| National/Homeland Security           | 3,592          | 1,835         | 134                      | 270          |
| Other                                | 17,140         | 11,943        | 681                      | 852          |
| Prescription/Illicit Drugs           | 1,322          | 1,116         | 89                       | 130          |
| President/Executive Administration   | 4,712          | 3,033         | 157                      | 225          |
| Tax Policy                           | 2,590          | 2,663         | 73                       | 162          |
| Town Hall/Meeting                    | 1,608          | 1,388         | 84                       | 103          |
| Veterans' Affairs                    | 2,840          | 2,047         | 444                      | 319          |
| <b>Total</b>                         | <b>113,755</b> | <b>71,118</b> | <b>4,557</b>             | <b>5,268</b> |

## Appendix G. Additional Analyses

**Table G1: Predicting Press Release Tone with Leadership Dummy**

|                         | Main Data Set<br>109th – 115th Congress |
|-------------------------|-----------------------------------------|
| White House Control     | 0.018**<br>(0.002)                      |
| Congress Control        | 0.010**<br>(0.003)                      |
| Key Votes               | 0.014**<br>(0.003)                      |
| Vote with Party         | -0.000<br>(0.000)                       |
| Influence               | -0.004**<br>(0.001)                     |
| Approval                | 0.000<br>(0.000)                        |
| Party Leadership        | 0.003<br>(0.005)                        |
| Constant                | 0.108***<br>(0.004)                     |
| Adjusted R <sup>2</sup> | 0.028                                   |
| N                       | 180,937                                 |

Note: Regressions estimated using ordinary least squares. The dependent variable of each model is the tone of press release, the unit of observation, in which positive press releases are higher values. The column estimates the tone using our *Main Data Set*. p<0.001, ‘\*\*\*’; p<0.01, ‘\*\*’, p<.05, ‘\*’.

**Table G2: Predicting Press Release Tone in Agricultural Press Releases Controlling for District Farmland**

| Main Data Set                    |                      |
|----------------------------------|----------------------|
| 109th – 115th Congress           |                      |
| White House Control              | 0.008**<br>(0.003)   |
| Congress Control                 | 0.019**<br>(0.003)   |
| Key Votes                        | -0.009**<br>(0.004)  |
| Vote with Party                  | -0.000***<br>(0.000) |
| Influence                        | -0.001<br>(0.001)    |
| Approval                         | 0.000<br>(0.000)     |
| Acres of Farmland (in thousands) | -0.000<br>(0.000)    |
| Constant                         | 0.145***<br>(0.003)  |
| Adjusted R <sup>2</sup>          | 0.025                |
| N                                | 2,811                |

Note: Regressions estimated using ordinary least squares. The dependent variable of each model is the tone of press release, the unit of observation, in which positive press releases are higher values. The column estimates the tone using our *Main Data Set*. p<0.001, ‘\*\*\*’; p<0.01, ‘\*\*’, p<.05, ‘\*’.

**Table G3: OLS regression testing whether differences in attention towards Republican issues are significant between Democrat and Republican senators and representatives**  
**Fractional Logit**

|                                                                                                                                                                                                                                                                                                                                                                                                                                                                                                                                                                                                                                                    | Owned by Republicans |                      | Owned by Democrats   |                      |
|----------------------------------------------------------------------------------------------------------------------------------------------------------------------------------------------------------------------------------------------------------------------------------------------------------------------------------------------------------------------------------------------------------------------------------------------------------------------------------------------------------------------------------------------------------------------------------------------------------------------------------------------------|----------------------|----------------------|----------------------|----------------------|
|                                                                                                                                                                                                                                                                                                                                                                                                                                                                                                                                                                                                                                                    | Senate               | House                | Senate               | House                |
| Republican                                                                                                                                                                                                                                                                                                                                                                                                                                                                                                                                                                                                                                         | 0.369***<br>(0.084)  | 0.484***<br>(0.058)  | -0.046<br>(0.115)    | -0.475***<br>(0.063) |
| 110th                                                                                                                                                                                                                                                                                                                                                                                                                                                                                                                                                                                                                                              | 0.371**<br>(0.181)   | 0.072<br>(0.145)     | 0.303<br>(0.203)     | 0.280**<br>(0.137)   |
| 111th                                                                                                                                                                                                                                                                                                                                                                                                                                                                                                                                                                                                                                              | 0.268<br>(0.182)     | -0.044<br>(0.131)    | 0.999***<br>(0.272)  | 0.766***<br>(0.142)  |
| 112th                                                                                                                                                                                                                                                                                                                                                                                                                                                                                                                                                                                                                                              | 0.486***<br>(0.174)  | 0.350***<br>(0.124)  | 0.446**<br>(0.202)   | 0.533***<br>(0.152)  |
| 113th                                                                                                                                                                                                                                                                                                                                                                                                                                                                                                                                                                                                                                              | 0.404***<br>(0.154)  | 0.332***<br>(0.123)  | 0.428**<br>(0.176)   | 0.537***<br>(0.132)  |
| 114th                                                                                                                                                                                                                                                                                                                                                                                                                                                                                                                                                                                                                                              | 0.368**<br>(0.165)   | 0.044<br>(0.127)     | 0.364**<br>(0.176)   | 0.551***<br>(0.133)  |
| 115th                                                                                                                                                                                                                                                                                                                                                                                                                                                                                                                                                                                                                                              | 0.213<br>(0.174)     | 0.134<br>(0.131)     | 0.521***<br>(0.195)  | 0.574***<br>(0.131)  |
| Constant                                                                                                                                                                                                                                                                                                                                                                                                                                                                                                                                                                                                                                           | -2.402***<br>(0.148) | -2.398***<br>(0.109) | -2.371***<br>(0.157) | -2.228***<br>(0.118) |
| R <sup>2</sup>                                                                                                                                                                                                                                                                                                                                                                                                                                                                                                                                                                                                                                     | 0.144                | 0.136                | 0.116                | 0.137                |
| N                                                                                                                                                                                                                                                                                                                                                                                                                                                                                                                                                                                                                                                  | 166                  | 644                  | 166                  | 644                  |
| <p>Note: Regressions estimated using fractional logistic regression. The dependent variable of each model is the percentage of press releases a MC devoted to the issues of a given party. The unit of analysis is MC. The first two columns present estimates of the percentage of press releases devoted to issues traditionally owned by Republicans, while the third and fourth columns present estimates for issues traditionally owned by Democrats. The first and third columns are estimates for the US Senate, while the second and fourth columns are estimates for the US House. p&lt;0.001, '***'; p&lt;0.01, '**', p&lt;.05, '*'.</p> |                      |                      |                      |                      |

**Table G4: OLS regression testing whether differences in attention towards issues owned by the opposite party are significant between the House majority and the House minority, Fractional Logit**

|                |                      |
|----------------|----------------------|
| Republican     | 0.162**<br>(0.076)   |
| House Control  | -0.172**<br>(0.074)  |
| Constant       | -2.209***<br>(0.040) |
| R <sup>2</sup> | 0.012                |
| N              | 644                  |

Note: Regression estimated using fractional logit. The dependent variable of each model is the percentage of press releases a House member devoted to the issues of the opposing party. The unit of analysis is legislator. p<0.001, '\*\*\*'; p<0.01, '\*\*', p<0.05, '\*'.

**Table G5: OLS regression testing whether differences in attention towards issues owned by the opposite party are significant between the Senate majority and House majority, Fractional Logit**

|                |                      |
|----------------|----------------------|
| Republican     | 0.091<br>(0.057)     |
| Senate         | 0.217***<br>(0.071)  |
| 110th Congress | 0.090<br>(0.136)     |
| 111th Congress | 0.333***<br>(0.142)  |
| 112th Congress | 0.359***<br>(0.124)  |
| 113th Congress | 0.304***<br>(0.120)  |
| 114th Congress | 0.097<br>(0.121)     |
| 115th Congress | 0.058<br>(0.123)     |
| Constant       | -2.455***<br>(0.123) |
| R <sup>2</sup> | 0.049                |
| N              | 810                  |

Note: Regression estimated using fractional logit. The dependent variable of each model is the percentage of press releases a legislator devoted to the issues of the opposing party. The unit of analysis is legislator. p<0.001, '\*\*\*'; p<0.01, '\*\*', p<0.05, '\*'.

**Table G6: OLS regression testing whether differences in attention towards credit claiming issues are significant between the MCs in the Close Elections population and MCs in the Main population, Fractional Logit**

|                |                      |
|----------------|----------------------|
| Close to Main  | -0.190**<br>(0.081)  |
| 115th Congress | -0.190**<br>(0.081)  |
| Constant       | -1.181***<br>(0.109) |
| R <sup>2</sup> | 0.054                |
| N              | 294                  |

Note: Regression estimated using ordinary least squares. The dependent variable of each model is the percentage of press releases devoted to credit claiming. p<0.001, '\*\*\*'; p<0.01, '\*\*', p<0.05, '\*'.

**Table G7: Predicting Press Release Tone, Subsetting By Divided Government, Main Population Data Set**

|                         | Unified Government   | Split Chambers       | Unified Chambers,<br>Divided Government |
|-------------------------|----------------------|----------------------|-----------------------------------------|
| White House Control     | 0.025***<br>(0.001)  | 0.036***<br>(0.005)  | 0.021<br>(0.017)                        |
| Key Votes               | 0.015***<br>(0.001)  | 0.006***<br>(0.001)  | 0.009***<br>(0.001)                     |
| Vote with Party         | -0.000<br>(0.000)    | 0.000**<br>(0.000)   | -0.000***<br>(0.000)                    |
| Influence               | -0.004***<br>(0.000) | -0.000<br>(0.000)    | -0.007***<br>(0.000)                    |
| Approval                | 0.000***<br>(0.000)  | -0.000***<br>(0.000) | -0.000***<br>(0.000)                    |
| Constant                | 0.107***<br>(0.001)  | 0.089***<br>(0.005)  | 0.110***<br>(0.017)                     |
| Adjusted R <sup>2</sup> | 0.046                | 0.024                | 0.015                                   |
| N                       | 95,433               | 53,534               | 50,159                                  |

Note: Regressions estimated using ordinary least squares. The dependent variable of each model is the tone of press release, the unit of observation, in which positive press releases are higher values. Estimates are for the tone using our *Main Data Set* sample. The first column estimates using press releases from periods of unified government. The second column estimates the tone of press releases from periods of government in which the chambers are controlled by different parties. The third column estimates using press releases from divided government, but both chambers are unified. p<0.001, '\*\*\*'; p<0.01, '\*\*', p<.05, '\*'.

**Table G8: Comparing the Effects of White House Control between the Main and Close Election Populations**

|                                         | All Press Releases<br>114th – 115th Congress | Main Data Set<br>114th – 115th Congress | Close Elections Data<br>Set<br>114th- 115th Congress |
|-----------------------------------------|----------------------------------------------|-----------------------------------------|------------------------------------------------------|
| White House Control                     | 0.019**<br>(0.002)                           | 0.018***<br>(0.002)                     | 0.008*<br>(0.003)                                    |
| Congress Control                        | 0.022<br>(0.070)                             | 0.029<br>(0.076)                        | -0.030<br>(0.053)                                    |
| Key Votes                               | 0.019***<br>(0.005)                          | 0.022***<br>(0.005)                     | -0.001<br>(0.005)                                    |
| Vote with Party                         | -0.000<br>(0.001)                            | -0.000<br>(0.001)                       | 0.000<br>(0.004)                                     |
| Influence                               | -0.007***<br>(0.002)                         | -0.008***<br>(0.002)                    | -0.001***<br>(0.003)                                 |
| Approval                                | 0.0003***<br>(0.0001)                        | 0.0003**<br>(0.0001)                    | 0.0002<br>(0.0001)                                   |
| Close Election                          | 0.017***<br>(0.005)                          |                                         |                                                      |
| Close Election X White<br>House Control | -0.011*<br>(0.005)                           |                                         |                                                      |
| Constant                                | 0.108***<br>(0.005)                          | 0.108***<br>(0.005)                     | 0.126***<br>(0.013)                                  |
| Adjusted R^2                            | 0.035                                        | 0.037                                   | 0.004                                                |
| N                                       | 72,009                                       | 62,888                                  | 9,121                                                |

Note: Regressions estimated using ordinary least squares. The dependent variable of each model is the tone of press release, the unit of observation, in which positive press releases are higher values. The first column estimates the tone using all press releases for all MCs in our sample and illustrates the interaction between White House control and Close Elections. The second column estimates the tone using our *Main Data Set* sample. The third column estimates the tone of press releases for MCs using elections decided by five percentage points or fewer. p<0.001, '\*\*\*'; p<0.01, '\*\*', p<0.05, '\*'.



**Table G9: Comparing the effects of White House Control and Congress control in the Main population**

|                         | Main Data Set<br>109th – 115th Congress<br>Unstandardized | Main Data Set<br>109th – 115th Congress<br>Standardized |
|-------------------------|-----------------------------------------------------------|---------------------------------------------------------|
| White House Control     | 0.018**<br>(0.002)                                        | 0.114*<br>(0.011)                                       |
| Congress Control        | 0.010**<br>(0.003)                                        | 0.060**<br>(0.019)                                      |
| Key Votes               | 0.014**<br>(0.003)                                        | 0.060***<br>(0.013)                                     |
| Vote with Party         | -0.000<br>(0.000)                                         | -0.010<br>(0.024)                                       |
| Influence               | -0.004**<br>(0.001)                                       | -0.075<br>(0.026)                                       |
| Approval                | 0.000<br>(0.000)                                          | 0.012<br>(0.009)                                        |
| Constant                | 0.109***<br>(0.004)                                       | -0.000<br>(0.026)                                       |
| Adjusted R <sup>2</sup> | 0.028                                                     | 0.028                                                   |
| N                       | 180,937                                                   | 180,937                                                 |

Note: Regressions estimated using ordinary least squares. The dependent variable of each model is the tone of press release, the unit of observation, in which positive press releases are higher values. The first column estimates the tone using our *Main Data Set* sample with unstandardized coefficients. The second column estimates the tone of press releases for MCs with standardized coefficients.  $p < 0.001$ , ‘\*\*\*’;  $p < 0.01$ , ‘\*\*’,  $p < 0.05$ , ‘\*’.

**Table G10: OLS regression testing whether differences in attention towards credit claiming issues are significant between the MCs in the Close Elections population and MCs in the Main population**

|                         |                      |
|-------------------------|----------------------|
| Close to Main           | -5.583***<br>(1.708) |
| 115th Congress          | -2.678**<br>(1.159)  |
| Constant                | 23.235***<br>(1.668) |
| Adjusted R <sup>2</sup> | 0.048                |
| N                       | 294                  |

Note: Regression estimated using ordinary least squares. The dependent variable of each model is the percentage of press releases devoted to credit claiming.  $p < 0.001$ , ‘\*\*\*’;  $p < 0.01$ , ‘\*\*’,  $p < 0.05$ , ‘\*’.

**Table G11:** A comparison of party-average sentiment scores across all thirty-seven issue topics between MCs in the *Main Data Set* and *Close Elections Data Set*, respectively. Comparisons in bold indicate that the 95-percent confidence intervals did not overlap between the two means

| White House                          |           |           |             |             |           |           |             |             |
|--------------------------------------|-----------|-----------|-------------|-------------|-----------|-----------|-------------|-------------|
| Congress                             |           |           |             |             |           |           |             |             |
|                                      | 114       |           | 114         |             | 115       |           | 115         |             |
|                                      | Main      | Close     | Main        | Close       | Main      | Close     | Main        | Close       |
| Topic                                | Democrats | Democrats | Republicans | Republicans | Democrats | Democrats | Republicans | Republicans |
| AG/Justice                           | 0.097     | 0.134     | 0.084       | 0.100       | 0.063     | 0.078     | 0.101       | 0.121       |
| Agriculture                          | 0.169     | 0.166     | 0.150       | 0.190       | 0.138     | 0.171     | 0.159       | 0.155       |
| Approp: Firefight                    | 0.210     | 0.188     | 0.179       | 0.204       | 0.213     | 0.215     | 0.173       | 0.196       |
| Approp: General                      | 0.149     | 0.138     | 0.131       | 0.148       | 0.143     | 0.155     | 0.140       | 0.138       |
| Approp: Healthcare                   | 0.123     | 0.121     | 0.115       | 0.134       | 0.112     | 0.107     | 0.138       | 0.128       |
| Approp: HUD                          | 0.172     | 0.169     | 0.156       | 0.166       | 0.156     | 0.184     | 0.158       | 0.175       |
| Approp: Transportation               | 0.148     | 0.144     | 0.155       | 0.163       | 0.150     | 0.174     | 0.181       | 0.197       |
| Approp: Water Proj.                  | 0.163     | 0.130     | 0.153       | 0.149       | 0.149     | 0.161     | 0.151       | 0.151       |
| Cancer/Research                      | 0.136     | 0.148     | 0.131       | 0.110       | 0.132     | 0.112     | 0.139       | 0.191       |
| Childrens' Issues                    | 0.141     | 0.171     | 0.131       | 0.131       | 0.091     | 0.113     | 0.128       | 0.152       |
| Civil/Human Rights                   | 0.119     | 0.144     | 0.068       | 0.111       | 0.104     | 0.100     | 0.074       | 0.109       |
| Energy/Clean/Oil                     | 0.145     | 0.162     | 0.140       | 0.164       | 0.125     | 0.173     | 0.157       | 0.174       |
| Environment                          | 0.119     | 0.137     | 0.097       | 0.098       | 0.106     | 0.115     | 0.113       | 0.114       |
| FDA/Food Policy                      | 0.112     | 0.147     | 0.134       | 0.125       | 0.088     | 0.100     | 0.134       | 0.059       |
| Federal Budget                       | 0.104     | 0.102     | 0.083       | 0.101       | 0.066     | 0.072     | 0.105       | 0.095       |
| Financial System/Consumer Protection | 0.104     | 0.107     | 0.078       | 0.121       | 0.089     | 0.093     | 0.094       | 0.094       |
| Gun Violence                         | -0.001    | 0.017     | 0.045       | 0.044       | 0.002     | 0.060     | 0.049       | 0.063       |
| Healthcare                           | 0.132     | 0.143     | 0.118       | 0.114       | 0.078     | 0.108     | 0.122       | 0.109       |
| High School Competition              | 0.210     | 0.216     | 0.220       | 0.243       | 0.204     | 0.225     | 0.211       | 0.219       |
| Higher Education                     | 0.187     | 0.211     | 0.188       | 0.208       | 0.173     | 0.202     | 0.201       | 0.196       |
| Honorary                             | 0.161     | 0.170     | 0.164       | 0.160       | 0.150     | 0.182     | 0.159       | 0.165       |
| International Relations/Conflict     | 0.110     | 0.122     | 0.095       | 0.105       | 0.089     | 0.099     | 0.111       | 0.113       |
| Iran/North Korea Nuclear Deal        | 0.084     | 0.086     | 0.066       | 0.065       | 0.061     | 0.060     | 0.062       | 0.059       |
| Iraq War                             | 0.066     | 0.090     | 0.065       | 0.071       | 0.074     | 0.093     | 0.064       | 0.050       |
| Jobs/Economy                         | 0.128     | 0.155     | 0.136       | 0.136       | 0.132     | 0.146     | 0.142       | 0.147       |
| Judicial nom.                        | 0.138     | 0.145     | 0.114       | 0.132       | 0.105     | 0.147     | 0.166       | 0.207       |
| Law Enforcement/Crime                | 0.082     | 0.074     | 0.057       | 0.089       | 0.061     | 0.092     | 0.064       | 0.080       |
| Legislative Activity/Voting          | 0.106     | 0.120     | 0.121       | 0.136       | 0.094     | 0.110     | 0.132       | 0.130       |
| Memorial/Womens' Issues              | 0.142     | 0.153     | 0.154       | 0.193       | 0.135     | 0.131     | 0.169       | 0.238       |
| Military/Defense                     | 0.116     | 0.132     | 0.109       | 0.124       | 0.110     | 0.138     | 0.123       | 0.129       |
| National/Homeland Security           | 0.104     | 0.122     | 0.089       | 0.114       | 0.088     | 0.107     | 0.098       | 0.123       |
| Other                                | 0.131     | 0.132     | 0.127       | 0.144       | 0.109     | 0.119     | 0.137       | 0.155       |
| Prescription/Illicit Drugs           | 0.069     | 0.085     | 0.083       | 0.087       | 0.066     | 0.083     | 0.082       | 0.079       |
| President/Executive Administration   | 0.120     | 0.143     | 0.071       | 0.087       | 0.057     | 0.068     | 0.108       | 0.108       |
| Tax Policy                           | 0.121     | 0.137     | 0.093       | 0.108       | 0.070     | 0.100     | 0.127       | 0.129       |
| Town Hall/Meeting                    | 0.151     | 0.176     | 0.125       | 0.165       | 0.149     | 0.160     | 0.138       | 0.150       |
| Veterans' Affairs                    | 0.157     | 0.142     | 0.148       | 0.147       | 0.158     | 0.164     | 0.159       | 0.159       |

**Table G12:** A comparison of party-average sentiment scores across all thirty-seven issue topics, across all seven sessions. Comparisons in bold indicate that the 95-percent confidence intervals did not overlap between the two means

| White House<br>Congress              | 109          |              | 110          |              | 111          |              | 112          |              | 113          |              | 114           |              | 115          |              |
|--------------------------------------|--------------|--------------|--------------|--------------|--------------|--------------|--------------|--------------|--------------|--------------|---------------|--------------|--------------|--------------|
| Topic                                | Democrats    | Republicans  | Democrats     | Republicans  | Democrats    | Republicans  |
| AG/Justice                           | <b>0.077</b> | <b>0.118</b> | <b>0.071</b> | <b>0.097</b> | 0.094        | 0.084        | <b>0.086</b> | <b>0.063</b> | <b>0.103</b> | <b>0.072</b> | 0.097         | 0.084        | <b>0.063</b> | <b>0.101</b> |
| Agriculture                          | 0.121        | 0.133        | <b>0.149</b> | <b>0.124</b> | 0.148        | 0.131        | 0.135        | 0.125        | <b>0.148</b> | <b>0.116</b> | 0.169         | 0.150        | <b>0.138</b> | <b>0.159</b> |
| Approp: Firefight                    | <b>0.185</b> | <b>0.257</b> | <b>0.190</b> | <b>0.218</b> | <b>0.183</b> | <b>0.216</b> | 0.210        | 0.198        | <b>0.215</b> | <b>0.153</b> | <b>0.210</b>  | <b>0.179</b> | <b>0.213</b> | <b>0.173</b> |
| Approp: General                      | 0.148        | 0.156        | 0.146        | 0.152        | <b>0.164</b> | <b>0.145</b> | <b>0.155</b> | <b>0.121</b> | <b>0.147</b> | <b>0.123</b> | <b>0.149</b>  | <b>0.131</b> | 0.143        | 0.140        |
| Approp: Healthcare                   | <b>0.119</b> | <b>0.159</b> | <b>0.120</b> | <b>0.157</b> | 0.146        | 0.157        | 0.130        | 0.123        | <b>0.138</b> | <b>0.111</b> | 0.123         | 0.115        | <b>0.112</b> | <b>0.138</b> |
| Approp: HUD                          | <b>0.145</b> | <b>0.202</b> | 0.146        | 0.152        | 0.160        | 0.147        | <b>0.164</b> | <b>0.109</b> | <b>0.161</b> | <b>0.134</b> | 0.172         | 0.156        | 0.156        | 0.158        |
| Approp: Transportation               | <b>0.153</b> | <b>0.177</b> | <b>0.139</b> | <b>0.168</b> | <b>0.160</b> | <b>0.177</b> | <b>0.152</b> | <b>0.137</b> | 0.147        | 0.137        | 0.148         | 0.155        | <b>0.150</b> | <b>0.181</b> |
| Approp: Water Proj.                  | 0.148        | 0.161        | 0.143        | 0.149        | 0.142        | 0.130        | <b>0.144</b> | <b>0.109</b> | <b>0.157</b> | <b>0.128</b> | 0.163         | 0.153        | 0.149        | 0.151        |
| Cancer/Research                      | 0.130        | 0.138        | 0.112        | 0.136        | 0.121        | 0.149        | 0.114        | 0.130        | 0.133        | 0.157        | 0.136         | 0.131        | 0.132        | 0.139        |
| Childrens' Issues                    | 0.143        | 0.153        | 0.143        | 0.154        | 0.170        | 0.159        | 0.155        | 0.131        | 0.130        | 0.128        | 0.141         | 0.131        | <b>0.091</b> | <b>0.128</b> |
| Civil/Human Rights                   | <b>0.121</b> | <b>0.080</b> | <b>0.109</b> | <b>0.071</b> | <b>0.123</b> | <b>0.081</b> | <b>0.116</b> | <b>0.064</b> | <b>0.132</b> | <b>0.078</b> | <b>0.119</b>  | <b>0.068</b> | <b>0.104</b> | <b>0.074</b> |
| Energy/Clean/Oil                     | <b>0.100</b> | <b>0.144</b> | 0.124        | 0.123        | <b>0.165</b> | <b>0.126</b> | 0.130        | 0.121        | <b>0.149</b> | <b>0.131</b> | 0.145         | 0.140        | <b>0.125</b> | <b>0.157</b> |
| Environment                          | 0.100        | 0.115        | 0.113        | 0.116        | <b>0.139</b> | <b>0.094</b> | <b>0.123</b> | <b>0.090</b> | <b>0.121</b> | <b>0.083</b> | <b>0.119</b>  | <b>0.097</b> | 0.106        | 0.113        |
| FDA/Food Policy                      | 0.108        | 0.110        | 0.110        | 0.103        | 0.107        | 0.107        | 0.101        | 0.110        | 0.098        | 0.112        | <b>0.112</b>  | <b>0.134</b> | <b>0.088</b> | <b>0.134</b> |
| Federal Budget                       | <b>0.061</b> | <b>0.098</b> | <b>0.102</b> | <b>0.077</b> | <b>0.113</b> | <b>0.051</b> | <b>0.071</b> | <b>0.048</b> | <b>0.078</b> | <b>0.057</b> | <b>0.104</b>  | <b>0.083</b> | <b>0.066</b> | <b>0.105</b> |
| Financial System/Consumer Protection | 0.100        | 0.110        | <b>0.099</b> | <b>0.076</b> | <b>0.093</b> | <b>0.068</b> | <b>0.096</b> | <b>0.079</b> | <b>0.114</b> | <b>0.082</b> | <b>0.104</b>  | <b>0.078</b> | 0.089        | 0.094        |
| Gun Violence                         | 0.048        | 0.065        | 0.037        | 0.071        | 0.040        | 0.062        | 0.023        | 0.020        | 0.035        | 0.020        | <b>-0.001</b> | <b>0.045</b> | <b>0.002</b> | <b>0.049</b> |
| Healthcare                           | <b>0.104</b> | <b>0.125</b> | 0.130        | 0.140        | <b>0.142</b> | <b>0.098</b> | <b>0.125</b> | <b>0.098</b> | <b>0.133</b> | <b>0.098</b> | <b>0.132</b>  | <b>0.118</b> | <b>0.078</b> | <b>0.122</b> |
| High School Competition              | <b>0.227</b> | <b>0.194</b> | 0.205        | 0.201        | <b>0.221</b> | <b>0.202</b> | 0.220        | 0.211        | 0.222        | 0.216        | 0.210         | 0.220        | <b>0.204</b> | <b>0.211</b> |
| Higher Education                     | <b>0.186</b> | <b>0.228</b> | <b>0.191</b> | <b>0.216</b> | 0.199        | 0.208        | 0.191        | 0.180        | 0.175        | 0.162        | 0.187         | 0.188        | 0.173        | 0.201        |
| Honorary                             | 0.152        | 0.164        | 0.169        | 0.170        | <b>0.165</b> | <b>0.146</b> | 0.138        | 0.137        | 0.151        | 0.150        | 0.161         | 0.164        | 0.150        | 0.159        |
| International Relations/Conflict     | 0.102        | 0.119        | 0.116        | 0.117        | 0.121        | 0.110        | <b>0.112</b> | <b>0.090</b> | 0.108        | 0.112        | <b>0.110</b>  | <b>0.095</b> | <b>0.089</b> | <b>0.111</b> |
| Iran/North Korea Nuclear Deal        | 0.060        | 0.076        | <b>0.072</b> | <b>0.109</b> | 0.074        | 0.080        | 0.077        | 0.081        | 0.080        | 0.068        | <b>0.084</b>  | <b>0.066</b> | 0.061        | 0.062        |
| Iraq War                             | <b>0.079</b> | <b>0.113</b> | <b>0.065</b> | <b>0.094</b> | 0.101        | 0.119        | 0.109        | 0.098        | 0.067        | 0.063        | 0.066         | 0.065        | 0.074        | 0.064        |
| Jobs/Economy                         | <b>0.107</b> | <b>0.148</b> | <b>0.117</b> | <b>0.136</b> | 0.123        | 0.113        | <b>0.134</b> | <b>0.109</b> | <b>0.144</b> | <b>0.130</b> | 0.128         | 0.136        | 0.132        | 0.142        |
| Judicial nom.                        | <b>0.139</b> | <b>0.162</b> | <b>0.104</b> | <b>0.131</b> | 0.145        | 0.134        | 0.129        | 0.125        | <b>0.148</b> | <b>0.102</b> | <b>0.138</b>  | <b>0.114</b> | <b>0.105</b> | <b>0.166</b> |
| Law Enforcement/Crime                | 0.080        | 0.084        | 0.081        | 0.083        | 0.083        | 0.081        | <b>0.099</b> | <b>0.070</b> | <b>0.087</b> | <b>0.060</b> | <b>0.082</b>  | <b>0.057</b> | 0.061        | 0.064        |
| Legislative Activity/Voting          | <b>0.113</b> | <b>0.132</b> | <b>0.127</b> | <b>0.115</b> | <b>0.129</b> | <b>0.097</b> | <b>0.111</b> | <b>0.101</b> | 0.109        | 0.104        | <b>0.106</b>  | <b>0.121</b> | <b>0.094</b> | <b>0.132</b> |
| Memorial/Womens' Issues              | 0.141        | 0.126        | 0.146        | 0.170        | 0.156        | 0.179        | 0.135        | 0.159        | 0.138        | 0.159        | 0.142         | 0.154        | <b>0.135</b> | <b>0.169</b> |
| Military/Defense                     | <b>0.109</b> | <b>0.126</b> | <b>0.103</b> | <b>0.127</b> | <b>0.121</b> | <b>0.095</b> | <b>0.115</b> | <b>0.099</b> | <b>0.106</b> | <b>0.090</b> | 0.116         | 0.109        | <b>0.110</b> | <b>0.123</b> |
| National/Homeland Security           | 0.103        | 0.099        | <b>0.120</b> | <b>0.092</b> | <b>0.113</b> | <b>0.079</b> | <b>0.109</b> | <b>0.075</b> | <b>0.113</b> | <b>0.067</b> | <b>0.104</b>  | <b>0.089</b> | 0.088        | 0.098        |
| Other                                | <b>0.128</b> | <b>0.141</b> | <b>0.130</b> | <b>0.144</b> | 0.136        | 0.130        | 0.130        | 0.113        | <b>0.129</b> | <b>0.120</b> | 0.131         | 0.127        | <b>0.109</b> | <b>0.137</b> |
| Prescription/Illicit Drugs           | <b>0.103</b> | <b>0.129</b> | 0.094        | 0.099        | 0.120        | 0.090        | 0.098        | 0.084        | 0.082        | 0.093        | <b>0.069</b>  | <b>0.083</b> | <b>0.066</b> | <b>0.082</b> |
| President/Executive Administration   | <b>0.099</b> | <b>0.139</b> | 0.110        | 0.130        | <b>0.136</b> | <b>0.093</b> | <b>0.124</b> | <b>0.081</b> | <b>0.121</b> | <b>0.069</b> | <b>0.120</b>  | <b>0.071</b> | <b>0.057</b> | <b>0.108</b> |
| Tax Policy                           | 0.104        | 0.109        | <b>0.109</b> | <b>0.096</b> | <b>0.098</b> | <b>0.075</b> | 0.083        | 0.082        | <b>0.114</b> | <b>0.084</b> | <b>0.121</b>  | <b>0.093</b> | <b>0.070</b> | <b>0.127</b> |
| Town Hall/Meeting                    | 0.139        | 0.160        | 0.140        | 0.141        | 0.129        | 0.142        | <b>0.144</b> | <b>0.126</b> | <b>0.154</b> | <b>0.131</b> | <b>0.151</b>  | <b>0.125</b> | 0.149        | 0.138        |
| Veterans' Affairs                    | <b>0.117</b> | <b>0.150</b> | <b>0.141</b> | <b>0.158</b> | 0.166        | 0.167        | 0.164        | 0.158        | <b>0.159</b> | <b>0.143</b> | 0.157         | 0.148        | 0.158        | 0.159        |

**Table G13: Predicting Press Release Tone, Accounting for Issue Ownership**

|                                     | Main Data Set<br>109th – 115th Congress | Main Data Set<br>109th – 115th Congress |
|-------------------------------------|-----------------------------------------|-----------------------------------------|
| White House Control                 | 0.017***<br>(0.002)                     | 0.017***<br>(0.002)                     |
| Congress Control                    | 0.010**<br>(0.003)                      | 0.009**<br>(0.003)                      |
| Key Votes                           | 0.014***<br>(0.003)                     | 0.014***<br>(0.003)                     |
| Vote with Party                     | -0.000<br>(0.000)                       | -0.000<br>(0.000)                       |
| Influence                           | -0.004**<br>(0.001)                     | -0.004**<br>(0.001)                     |
| Approval                            | 0.000<br>(0.000)                        | 0.000<br>(0.000)                        |
| Party Owns Issue                    | -0.013***<br>(0.002)                    | -0.016***<br>(0.002)                    |
| Party Owns Issue x WH Control       |                                         | 0.002<br>(0.002)                        |
| Party Owns Issue x Congress Control |                                         | 0.007**<br>(0.002)                      |
| Constant                            | 0.111***<br>(0.004)                     | 0.111***<br>(0.004)                     |
| Adjusted R <sup>2</sup>             | 0.031                                   | 0.031                                   |
| N                                   | 180,937                                 | 180,937                                 |

Note: Regressions estimated using ordinary least squares. The dependent variable of each model is the tone of press release, the unit of observation, in which positive press releases are higher values. Both columns estimate the tone using our *Main Data Set*, with the second column illustrating interaction between control variables and Party Own Issue. p<0.001, '\*\*\*'; p<0.01, '\*\*', p<0.05, '\*'.

**Figure G1:** The quartile numbers for the percentages of press releases issued by MCs in the *Main Data Set* and the *Close Elections Data Set*, respectively. Numbers are higher for the *Close Elections Data Set*

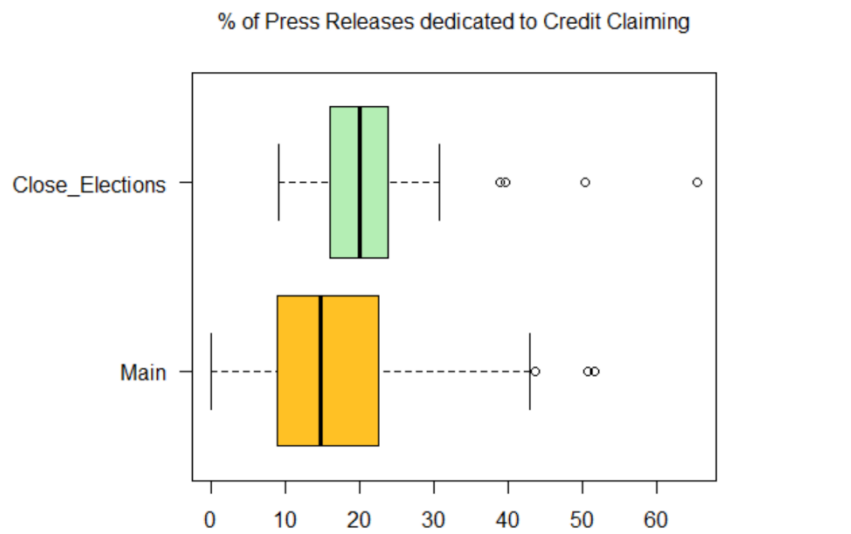

Supplement: Supplementary file 1 [file 23659062]
